# 1 Extracellular vesicle fusion visualized by cryo-EM

2 Mattia I. Morandi <sup>1</sup>, Petro Busko <sup>1</sup>, Efrat Ozer-Partuk <sup>1</sup>, Suman Khan <sup>1</sup>, Giulia Zarfati <sup>1</sup>, Yael Elbaz-  
3 Alon <sup>1</sup>, Paula Abou Karam <sup>1</sup>, Tina Napso Shogan <sup>2</sup>, Lana Ginini <sup>2</sup>, Ziv Gil <sup>2,3</sup>, Neta Regev-Rudzki <sup>1,a</sup> &  
4 Ori Avinoam <sup>1,a</sup>

5 <sup>1</sup> Department of Biomolecular Sciences, Weizmann Institute of Science, Rehovot, 7610001, Israel

6 <sup>2</sup> Rappaport Institute, Technion, Haifa, 3109601, Israel

7 <sup>3</sup> Department of Otolaryngology, Head, and Neck Surgery, Rambam Health Care Campus, Haifa,  
8 3109601, Israel

9 <sup>a</sup> Correspondence: [neta.regev-rudzki@weizmann.ac.il](mailto:neta.regev-rudzki@weizmann.ac.il), [ori.avinoam@weizmann.ac.il](mailto:ori.avinoam@weizmann.ac.il)  
10

## 11 **Abstract**

12 Extracellular vesicles (EVs) transfer bioactive molecules between cells in a process reminiscent of  
13 enveloped viruses. EV cargo delivery is thought to occur by protein-mediated and pH-dependent  
14 membrane fusion of the EV and the cellular membrane. However, there is a lack of methods to  
15 identify the fusion proteins and resolve their mechanism. We developed and benchmarked an *in*  
16 *vitro* biophysical assay to investigate EV membrane fusion. The assay was standardized by directly  
17 comparing EV- and viral- fusion with liposomes. We show that EVs and retroviruses fuse with  
18 liposomes mimicking the membrane composition of the late endosome in a pH and protein-  
19 dependent manner. Moreover, we directly visualize the stages of membrane fusion using cryo-  
20 electron tomography. We find that, unlike most retroviruses, EVs remain fusogenic after  
21 acidification and re-neutralization. These results provide novel insights into the EV cargo delivery  
22 mechanism and an experimental approach to identify the EV fusion machinery.

## 23 **Introduction**

24 Extracellular vesicles (EVs) are membrane-enclosed compartments ranging from 50 to 500 nm in  
25 diameter loaded with proteins, lipids, RNA, and DNA. They are secreted from several cell types and  
26 generally promote physiological and pathological processes, including the immune response, cancer  
27 development and metastasis (1–6). They are also extensively studied for their potential clinical  
28 application as diagnostic biomarkers and drug delivery systems (3, 7, 8).

29 EVs have been classified into three major subpopulations (i.e., microvesicles, apoptotic bodies, and  
30 exosomes), each composed of a heterogeneous pool of vesicles (9). While microvesicles and  
31 apoptotic bodies bud from the plasma membrane, exosomes bud into the lumen of multivesicular  
32 bodies (MVBs) and exit cells after MVB fusion with the cell membrane (i.e. MVB exocytosis) (10, 11).  
33 Regardless of their classification, EVs enter recipient cells from the extracellular environment  
34 primarily through vesicular uptake and must release their cargo into the cytoplasm to modulate cell  
35 physiology (12).

36 The biogenesis, size, and composition of EVs are remarkably similar to many enveloped single-  
37 stranded RNA viruses such as Rhabdoviruses (e.g., Vesicular Stomatitis Virus), Orthomyxoviruses  
38 (e.g., Influenza), and Retroviruses (e.g., Human Immunodeficiency Virus) (13, 14). The envelopes of  
39 such viruses contain glycoproteins that function as ligands to attach the virus to specific cellular  
40 receptors and then mediate fusion between the cell membrane and the viral envelope (15). These  
41 glycoproteins are also frequently essential for virion assembly and budding (16). As such, membrane  
42 fusion has been suggested as the primary mechanism of EV cargo delivery (17–20).

43 EV cargo delivery has been shown to depend on proteins (19, 20) and to be triggered by low pH (17,  
44 19, 20). Moreover, the efficiency of cargo delivery can be modulated by changing the lipid  
45 composition in the endosome (17, 18). These findings reinforce the hypothesis that most EV cargo

46 delivery occurs by EV membrane fusion, triggered by the late endosomal milieu. Nevertheless, the  
47 fusion mechanism remains incompletely understood and it is unclear how triggering fusion by low  
48 pH is compatible with exosome biogenesis in the acidic MVBs (21).

49 Based on the biophysical assays developed to study viral fusion, we developed an *in vitro* assay to  
50 investigate EV membrane fusion by probing the interaction of EVs with artificial liposomes. Using a  
51 Forster Resonance Energy Transfer (FRET)-based assay to directly compare EV and viral fusion at the  
52 level of membrane mixing *in vitro*, we demonstrate that EVs can fuse unilaterally to lipid membranes  
53 in a pH-dependent manner, consistent with previous studies (19, 20). Moreover, we benchmark the  
54 assay by directly comparing EVs and viruses, and resolving the fusion intermediates using cryogenic  
55 Transmission Electron Microscopy (Cryo-TEM) and Electron Tomography (Cryo-ET). We find that in  
56 EVs, contrary to most viruses, the low-pH-trigger is reversible, as previously shown for vesicular  
57 stomatitis virus, VSV (22, 23).

58 These results provide novel insight into the mechanism of EV fusion, suggesting that viral and EV  
59 fusogens likely share structural and functional similarities and may even share common ancestors.  
60 Moreover, they establish a standard method for further functional and structural studies of the  
61 fusion process that could lead to the identification of the EV fusion machinery and become a gold  
62 standard approach in the EV fusion field.

63

64 **Results**

65 **EVs and large unilamellar vesicles (LUVs) can be distinguished using cryo-TEM**

66 The delivery of the EV cargo into the host-cell cytoplasm must initiate with binding to the recipient  
67 cell membrane, followed by either fusion with the plasma membrane or vesicular uptake (i.e.,  
68 endocytosis) of the EV, followed by fusion with the endosome (**Fig. 1 A**) (12). To bypass this  
69 complexity and focus on the fusion process, we probed the interaction of EVs with liposomes *in*  
70 *vitro*.

71 We purified extracellular vesicles from OVCAR-3 cell culture supernatant using OptiPrep density  
72 gradient ultracentrifugation (24) following MISEV guidelines (25). We subsequently pooled the EV  
73 fractions and pelleted them through a sucrose cushion (26). We examined EV (and LUVs) samples  
74 size and morphology using nanoparticle tracking analysis (NTA) (**Fig 1 B and Figs. S1 A-B**) and Cryo  
75 – TEM (**Fig. 1 C**), showing that the isolated EVs display the typical morphology and size distribution  
76 of EVs with an average diameter of  $132.5 \pm 2.1$  nm. We also detected the known EV markers CD63,  
77 Alix and CD9 (25), but not the mitochondria-specific protein TOM20, as expected with purified EVs  
78 (25) (**Fig. 1 E**). Isolation from naïve growth medium was used as a control to verify that EVs originate  
79 from the cultured cells and not from the bovine serum (**Fig. S1 B**).

80 LUVs extruded at 100 nm showed a narrow diameter distribution at  $109.9 \pm 2.6$  nm (**Fig 1 C**).  
81 Importantly, we could distinguish EVs and LUVs in cryo-TEM by the spatial distribution of gray levels  
82 within each vesicle lumen (**Fig 1 C and D**). LUVs display a smooth distribution while EVs display a  
83 granular pattern characterized by periodicity in the radial intensity signal, consistent with the  
84 absence and presence of cargo, respectively (**Fig. 1 D**).

85 **Membrane mixing between EVs and LUVs is triggered by low pH**

86 We then turned to methods extensively utilized in virology to study viral membrane fusion and  
87 established an *in vitro* membrane mixing assay based on FRET (**Fig. 2 A**) to probe EV membrane

88 fusion with lipid membranes. (27–32). To benchmark the assay, we conducted the experiments with  
89 EVs and non-replicating retroviruses, stained with the lipid dyes DiI and DiD as a FRET pair. At steady-  
90 state, DiI fluorescence emission is transferred to and absorbed by DiD. The FRET-labelled vesicles or  
91 viruses were incubated with unlabeled LUVs. If fusion occurs, donor intensity increases due to the  
92 dilution of the vesicles or viruses by the unlabeled LUV membranes, which increases the distance  
93 between the FRET pair. The donor's fluorescence (DiI) is monitored, and its intensity is normalized  
94 to the maximum donor intensity, which is obtained by fully solubilizing the membranes using a  
95 detergent (**Fig. 2 A**). To mimic the lipid composition of the late endosome membrane, we conducted  
96 this analysis using LUVs enriched in bisoleoyl-lysobisphosphatidic acid (LBPA) and without  
97 cholesterol (33). For controls, we used labeled retroviruses or LUVs mixed with unlabeled LUVs.

98 As pH acidification was shown to trigger viral (23, 34) and EV fusion (19, 20), we validated the assay  
99 by testing whether membrane mixing is pH-dependent. Incubation of the labeled EVs with  
100 unlabeled LUVs at pH 7.4 shows negligible membrane mixing, indicating no fusion occurs (**Fig. 2 B**).  
101 Upon acidification (ranging from pH 7.4 to 5.0), we observed significant membrane mixing for EVs  
102 and viruses at comparable efficiencies ( $p = 0.699$ ;  $24.4 \pm 10.0\%$  and  $22.7 \pm 8.7\%$  respectively; **Fig. 2**  
103 **C and Figs. S2 A**). LUV control showed no significant variation in membrane mixing across the range  
104 of acidic pH values, indicating that pH alone is not sufficient to induce fusion and lipid mixing (**Fig.**  
105 **S2 A**). Additionally, no membrane mixing is measured in fractions and naïve growth medium absent  
106 of EVs (**Fig. S2 B-C**).

107 If fusion occurs between EVs and LUVs, then the size distribution of the population is expected to  
108 skew towards larger vesicles upon acidification. To test size distributions under different pH  
109 conditions directly, we performed NTA analysis on the mixed EVs and LUVs at pH 7.4 compared to  
110 pH 5.0. We observed that at pH 7.4, the diameters are consistent with a mixed population of EVs  
111 and LUVs. However, the diameters shift towards larger sizes after acidification, consistent with

112 vesicle fusion ( $219 \pm 20$  nm at pH 7.4,  $300 \pm 30$  nm at pH 5.0,  $p = 2,36E-9$ ; **Fig. 2 D and Fig. S2 D**).

113 Together, these results demonstrate that EVs fuse in a process triggered by low pH, similar to

114 viruses.

### 115 **EV proteins and target membrane lipid composition are essential for fusion**

116 Next, we examined if EV fusion is protein mediated by proteolytically “shaving” the proteins from

117 the EV membrane using Proteinase K (PK), a broad-spectrum serine protease (35, 36). We observed

118 a significant reduction in membrane mixing of EVs shaved with PK ( $46 \pm 18$  % compared to NT EVs;

119  $p = 0.00104$  **Fig. 2 E**). PK treatment showed no significant vesicle size distribution or concentration

120 alteration as measured by NTA (**Fig. S2 E**). Fusion efficiency was also not affected by treatment with

121 the protease inhibitor phenylmethylsulfonyl fluoride (PMSF), which was used to quench PK

122 digestion (**Fig. S2 F**). These results suggest that EV membrane proteins are critical for the fusion

123 mechanism, consistent with previous reports showing that EV content release is protein-dependent

124 (19). We next verified by western blot that PK digestion removed the EV membrane protein PTGFRN

125 (37) but retained the luminal protein Alix, showing that EV integrity was maintained and only surface

126 proteins were digested (**Fig. 2 F**).

127 EVs fuse to late endosomal-mimicking membranes at pH 5.0 (**Fig. 2 C**) with an efficiency comparable

128 to viruses. To investigate whether the late-endosomal lipid LBPA is essential for efficient fusion, we

129 examined whether EVs could fuse at a similar probability to either single-component lipid bilayer

130 (DOPC) or early endosomal-mimicking membranes. We found that fusion does not occur when EVs

131 interact with non-physiological DOPC LUVs (**Fig. 3 A**,  $1.0 \pm 1.1$  %), reinforcing the concept that lipid

132 composition is crucial for membrane fusion (38). Moreover, we observed significantly lower fusion

133 efficiency with early endosomal-mimicking LUVs compared to late endosome composition ( $9.2 \pm 5.3$

134 % and  $28.2 \pm 10.1$  % respectively;  $p = 0.000125$ ). This effect may arise from cholesterol in the bilayer,

135 which was reported to inhibit efficient cargo transfer from EVs to recipient cells at the late  
136 endosome (17).

### 137 **The putative EV fusogen is insensitive to pre-acidification**

138 Viral fusogens typically undergo an irreversible conformational change at low pH (39). Hence,  
139 exposing retroviruses to low pH in the absence of target membranes inactivates the fusogen. Since  
140 the biogenesis of specific EV subpopulations occurs in the acidic milieu of MVBs (e.g., exosomes)  
141 (40), we hypothesized that the conformational change of the putative EV fusogen might be  
142 reversible, as shown for the viral fusogen VSV-G (22, 41, 42). To test this hypothesis, we measured  
143 the ability of EVs to fuse after acidification and subsequent re-neutralization of the pH values prior  
144 to incubation with LUVs and reacidification. Membrane mixing efficiency was evaluated under these  
145 conditions and compared to both pseudotyped VSV and retroviruses as positive and negative  
146 controls, respectively (43). While retroviruses lost their membrane mixing activity after acidification  
147 and re-neutralization, VSV and EVs exhibited comparable membrane mixing probabilities in the two  
148 conditions (**Fig. 3 B and S3**). We conclude that the putative EV fusogen is triggered by low pH but in  
149 a reversible manner. These results are consistent with a model wherein EVs are not fusogenic during  
150 their biogenesis in the acidic lumen of the MVB, and only become primed for fusion upon release  
151 into the neutral pH of the extracellular space. Moreover, they imply that the glycoproteins on the  
152 EV surface may be structurally similar to VSV-G.

### 153 **EV fusion intermediates visualized by Cryo-TEM**

154 Having demonstrated that the *in vitro* EV-LUV system recapitulates the previously reported protein-  
155 and pH-dependence, we used Cryo-TEM to visualize EV - LUV interactions (**Fig. 4**). Membrane fusion  
156 intermediate states canonically associated with viral fusion include (i) close contact between the  
157 lipid bilayers, (ii) fusion of the outer leaflets to form a hemifusion diaphragm, (iii) fusion of the inner  
158 leaflets to allow content mixing, and (iv) expansion of the fusion pore (44–46) (**Fig. 4 A**). EV

159 incubated with LUV at pH 5.0 and 7.4 showed a similar percentage of close contacts between the  
160 two vesicle populations ( $38.5 \pm 16.6$  % and  $26.2 \pm 8.6$  % respectively; **Fig. 4 B and F**). Remarkably,  
161 fusion intermediates including hemifusion (**Fig. 4 C and F**;  $6.8 \pm 2.8$  %), content mixing (**Fig. 4 D and**  
162 **F**;  $10.4 \pm 5.9$  %) and expanded pore (**Fig. 4 E and F**;  $8.8 \pm 1.6$  %) were only apparent at pH 5.0. LUVs  
163 alone displayed some close contacts but no fusion intermediates at both pH 7.4 and 5.0 ( $6.9 \pm 2.6$   
164 % and  $5.4 \pm 0.9$  % respectively; **Fig. 4 F and Fig. S4 A**).

165 To resolve the 3D ultrastructure of the fusion intermediates and unambiguously determine if  
166 content mixing occurs through an expanded pore, we used Cryo-ET. Reconstructed tilt series of  
167 acidified EVs with LUVs clearly showed content mixing and expanded pore between EVs and LUVs,  
168 with the two membranes fully merged and a narrow connection between the two vesicular lumens  
169 (**Fig. 4 G, S4 B and Movie S1, S2**). These results demonstrate that EV fusion is triggered by low pH  
170 and that membrane mixing using FRET is a *bona fide* method to measure fusion and the efficiency  
171 of cargo delivery under varying conditions.

## 172 **Discussion**

173 While it has not been unambiguously shown, the hypothesis that EV cargo delivery occurs via  
174 membrane fusion is supported by several studies (17–20). Yao *et al.* showed that membrane mixing  
175 of labeled exosomes occurs at the endosomes and that mixing depends on the late endosomal lipid  
176 LBPA (18). Similarly, Joshi *et al.* demonstrated that release of GFP from the EV lumen occurs at the  
177 late endosome and that inhibiting endosome acidification or cholesterol depletion suppresses EV  
178 cargo delivery (17). In two separate studies, Bonsergent *et al.* demonstrated *in vitro* that EV content  
179 release to plasma membrane sheets is protein and pH-dependent and that the delivery can be  
180 inhibited by IFITM proteins on the apposing membrane (19, 20). However, these assays could not  
181 unambiguously demonstrate that membrane fusion between EV and membranes occurs.



182 To overcome this challenge, we standardized a robust *in vitro* fusion assay between EV and LUVs  
183 and benchmarked it using viruses. We show that the assay recapitulates all the features previously  
184 observed for EV cargo delivery and allows better control over both the environmental conditions  
185 and the lipid composition of the target membrane. Moreover, the assay and fusion process can be  
186 readily visualized by Cryo-EM and Cryo-ET.

187 Taking advantage of these advantages, we show that EV fusion is unidirectional *in vitro* and does  
188 not require proteins on the target membrane. Moreover, fusion occurs via hemifusion. These  
189 features are strikingly similar to viral fusion, suggesting that the EV fusogen or fusogens might share  
190 structural similarities, or even common ancestors, with viral fusogens. Moreover, we demonstrate  
191 that changes in the delivery efficiency reported for specific lipid compositions (17) or upon pH  
192 acidification (19) are directly related to EV fusion.

193 Remarkably, our results also show that EVs are not inactivated if exposed to acidic pH in the absence  
194 of target membranes, suggesting a reversible conformational change of the EV fusogen, similarly to  
195 the viral fusogen VSV-G. These results are consistent with a model wherein the EVs (e.g., exosomes)  
196 that bud into the acidic lumen of the MVB are in an inactive non-fusogenic state. EVs are then  
197 activated at neutral pH after secretion to the extracellular space and fuse in a pH-dependent manner  
198 after internalization into target cells. Thus, EVs avoid a paradoxical scenario wherein exposure to  
199 acidic pH during assembly would also irreversibly inactivate their fusion machinery.

200 We have previously suggested that EVs derived from malaria-infected red blood cells (RBCs) can  
201 fuse to LUVs that mimic the lipid composition of the plasma membrane in a pH-independent manner  
202 (47). The absence of a pH trigger is consistent with the lack of endocytosis in RBCs, and suggests  
203 that the fusion mechanism and the fusogens might be context-dependent. This hypothesis further  
204 reinforces the analogy to viruses that have evolved different triggering mechanisms. Therefore, it  
205 will be essential to define the fusion mechanism of different subpopulations of EVs and identify the

206 EV fusogens. However, better separation of EVs to structurally and functionally distinct  
207 subpopulations remains a confounding challenge.

208 A benchmarked assay that recapitulates *bone fide* EV fusion could become an essential tool in  
209 identifying the fusion machinery. Candidate proteins could be deleted in producing cells and EV  
210 fusogenicity could be evaluated with high throughput. Moreover, showing that isolated EVs  
211 maintain their fusogenic activity has the potential to become a gold standard in the study of EVs  
212 (25). Understanding the mechanism of EV membrane fusion is essential not only for expanding our  
213 knowledge in EV biology but also for developing them into biocompatible and tissue-specific  
214 delivery systems.

## 215 **Materials and Methods**

### 216 **Statistical analysis**

217 All experiments were carried out with  $n \geq 3$  biological replicates. Statistical analysis was carried out  
218 using OriginPro software. In all Figures containing box plots, each dot represents one measurement.  
219 Box layouts represent 25 – 75 percentiles of the distribution, whiskers highlight outliers data points,  
220 and horizontal black lines represent mean of the distribution. Whenever comparing two conditions,  
221 data were analyzed with a two-sample student's t-test with a significance level of 0.05. Throughout  
222 the study, the threshold for statistical significance was considered for p-values  $\leq 0.05$ , denoted by  
223 one asterisk (\*), two (\*\*) if  $p \leq 0.01$ , three (\*\*\*) if  $p < 0.001$  and four (\*\*\*\*) if  $p \leq 0.0001$ .

### 224 **Cell culture and EV isolation**

225 Extracellular vesicles derived from ovarian cancer cells (OVCAR-3; ATCC HTB - 161) conditioned  
226 media were harvested as previously described (48). Briefly, cells were seeded at  $10 \times 10^6$  cells in a  
227 175 cm<sup>2</sup> flask in culture media composed of DMEM with 10% EV-free FBS, 1% Sodium Pyruvate, 1%  
228 L-Glutamate and 1% PenStrep. When cells had reached 70% confluence (typically two days post-  
229 seeding), the cells were washed twice with PBS -/- and replenished with naive EV-free growth  
230 medium. Cell culture media was collected after 48 hours and spun at 300g for 10 min at 4°C to  
231 remove large debris and leftover cells, supernatant was collected and spun at 2,000g for 10 min at  
232 4°C. Supernatant was then collected, spun at 10,000g for 45 min to remove larger vesicular particles,  
233 and filtered through a 0.22  $\mu\text{m}$  polycarbonate filter. The resulting media was used for vesicles  
234 isolation within 2 days or frozen at -80°C for biochemical analysis.

235 Following filtration, the cell culture media was spun using an ultracentrifuge, a Ti45 rotor (Beckman  
236 Coulter, Fullerton, CA, USA) at 100,000 g for 4 h at 4°C. Supernatant was removed and the resulting  
237 pellet was washed once with PBS -/- and resuspended in PBS -/-. For membrane mixing experiments,

238 cell culture media was incubated with 0.01% v/v of 2.5 mM DiI (Merck, CAT: 42364) and DiD (Thermo  
239 Fisher, D7757)) 1:1 mixture in DMSO at 37°C for 30 min.

#### 240 **Density gradient ultracentrifugation**

241 Following differential ultracentrifugation, EVs were fractionated by OptiPrep density gradient  
242 ultracentrifugation (100,000 × g, 18 h, 4 °C) using a SW41 rotor (Beckman Coulter, Fullerton, CA,  
243 USA) through a continuous 5–40% OptiPrep (Sigma-Aldrich, D1556) gradient. Fractions (1 ml) were  
244 collected from the top of the gradient for further analysis, and density was verified by measuring  
245 the mass of a 100 µL aliquot of each fraction. Fractions of EV-specific density were then pooled  
246 together and subsequently concentrated via ultracentrifugation (100,000 × g, 4 h, 4 °C) through a  
247 20% w/v sucrose cushion in a SW41 rotor (Beckman Coulter, Fullerton, CA, USA). The resulting  
248 supernatant was discarded, and the EV pellet was resuspended in PBS -/-.

#### 249 **Preparation of vesicle-depleted Fetal Bovine Serum (EV-free FBS)**

250 FBS was depleted from extracellular vesicles by two rounds of ultra-centrifugation at 100,000 g for  
251 18 h in a Beckman Ti45 rotor; each round the supernatant was collected and the large pellet at the  
252 bottom of the tube discarded. After the final round of ultracentrifugation, supernatant was  
253 collected and filtered through a 0.22 µm pore membrane, aliquoted and stored at -20°C for  
254 preparation of EV-free growth medium.

#### 255 **Nanoparticle tracking analysis**

256 EV size and concentration distribution analysis was performed using nanoparticle tracking analysis  
257 (Malvern Instruments Ltd., NanoSight NS300) at 20 °C. Sample size distributions were obtained in a  
258 liquid suspension (1:500 - 1:1000 dilution in PBS -/-) by analyzing Brownian motion via light  
259 scattering. The camera level was set to 13 and gain to 1, with a 405 nm laser unit without filter,  
260 following the manufacturer's instruction. The data was analyzed using NTA 2.1 software (NanoSight)  
261 and plotted using the OriginPro software.

## 262 **Western blot analysis**

263 Equal volumes of pelleted OptiPrep fractions and 20-30 µg of protein cell lysates were mixed with  
264 4x Laemmli sample buffer (4% SDS, 10% mercaptoethanol, 20% glycerol, 0.004% bromophenol blue  
265 and 0.125M Tris-HCl) and boiled at 96°C for 5-10 minutes. Samples were subjected to  
266 electrophoresis using 7-15% SDS-PAGE gels in TG-SDS running buffer (Bio-Lab) at constant 150 V for  
267 1 h. Proteins were electrotransferred onto nitrocellulose membranes using a standard tank transfer  
268 protocol with TG transfer buffer (Bio-Lab) with 20% methanol. Membranes were blocked with 5%  
269 non-fat milk dissolved in TBS containing 0.1% Tween (TBST) for one hour and incubated with one of  
270 the following primary antibodies either overnight at 4°C or 1 hour at room temperature. (dilution,  
271 company, catalog number): anti-CD9 (1:1000, Abcam, ab92726), anti-PTGFRN (1:1000, R&D  
272 Systems, MAB10043-100), anti-CD63 (1:1000, Proteintech, 25682-1-AP), anti-Alix (1:1 000,  
273 Proteintech, 12422-1-AP), anti-Tom20 (1:1 000, Abcam, ab56783). The primary antibodies were  
274 diluted in 5% non-fat dry milk in TBST. Membranes were washed 3 times for 10 minutes at room  
275 temperature with TBST and incubated with either anti-Mouse IgG-HRP (1:20 000, Abcam, ab6728)  
276 or anti-Rabbit IgG-HRP (1:20 000, Abcam, ab6721) diluted in TBST for 1 hour. Membranes were  
277 washed 3 times for 10 minutes with TBST. EZ-ECL (Biological Industries Ltd.) was used for detection  
278 with the sequential visualization using the Odyssey Fc Dual-Mode Imaging System (Li-COR  
279 Biosciences, USA). Each presented western blot is a representative image of three separate  
280 biological replicates.

## 281 **Preparation of large unilamellar vesicles (LUVs)**

282 LUVs were prepared with a lipid composition either of DOPC or mimicking the membranes of early  
283 and late endosomes. For early endosome-mimicking LUVs, the lipid content was  
284 DOPC:DOPE:SM:chol 30:10:25:35, while late endosome-mimicking LUVs were composed of  
285 LBPA:DOPE:DOPC 70:5:25 (molar ratio) to mimic the cholesterol sequestration and enrichment of

286 late endosomal lipid LBPA (49). Lipid solutions in chloroform of the different phospholipid species  
287 were mixed to the desired molar ratios in a glass vial, and the organic solvent was evaporated by 12  
288 h of vacuum pumping. For labeled LUVs, the lipids were stained at a 2 % mol/mol fraction of Dil and  
289 DiD in chloroform before evaporation. The lipid film was then hydrated with PBS -/- at 50 °C to reach  
290 the desired concentration and gently vortexed. The resulting MLV suspension was then sonicated  
291 for 10 min to disperse larger aggregates and the liposomal suspension was extruded 21 times  
292 through polycarbonate filters (100 nm pore size, Avanti Polar Lipids) using a mini-extruder (Avanti  
293 Polar Lipids). Size and concentration were verified using NTA and the liposomal suspension was used  
294 within 2 weeks from extrusion.

### 295 **Retroviruses preparation**

296 Retroviruses were generated by transfecting pBABE-Puro plasmids, a gift from Hartmut Land & Jay  
297 Morgenstern & Bob Weinberg (Addgene plasmid # 1764, (50)), into Platinum-E Cells (Cell Biolabs,  
298 Inc.). 24hrs prior to transfection,  $3 \times 10^6$  were seeded in 10cm culture dish according to  
299 manufacturer instructions. 10 $\mu$ g of retroviral plasmid DNA was transfected  
300 using jetPRIME<sup>®</sup> transfection reagent (PolyPlus transfection). 5ml of viral suspension was collected  
301 from the conditioned media 48hrs post-transfection and centrifuged at 1,000 g for 10 min at 4°C to  
302 remove cell debris. The supernatant was carefully transferred into another ice-cooled falcon tube.  
303 Virions were concentrated by pelleting at 100,000 g through a 20% sucrose cushion for 2 h and  
304 resuspended in PBS -/- The concentrated viruses were used for further experiments.

### 305 **Preparation of VSV $\Delta$ G-G pseudoviruses**

306 Baby Hamster Kidney cells (BHK-21; ATCC) were grown in Dulbecco's modified Eagle's medium  
307 (DMEM, Gibco), 1% Penn/Strep, 7-10% Fetal Bovine Serum (FBS, Biological Industries, Kibbutz Beit  
308 Haemek, Israel) at 37°C in 5% CO<sub>2</sub>. For maintenance, BHK-21 cells were grown at 7% FBS. For  
309 pseudovirus preparations, BHK-21 cells were grown at 10% FBS.

310 To generate VSV-G-complemented VSVΔG pseudoviruses (VSVΔG-G), 200,000 BHK-21 cells were  
311 seeded in 5 ml of medium. Cells were transfected at ~70% confluency with plasmids encoding VSV-  
312 G (Indiana) glycoprotein (1 μg/ml) (51). After 24 hours incubation, transfected cells were infected  
313 with VSVΔG-G helper viruses at a multiplicity of infection (MOI) of 5 for 1 hour at 37°C in a 5% CO<sub>2</sub>  
314 incubator rocking every 15 minutes. After 1 hr, the medium was replaced with serum-free medium.  
315 24 hours post-infection, the cells were scraped off and transferred with the supernatant into ice-  
316 cooled falcon tubes. The cell debris were removed by centrifuge at 500 g for 10 mins at 4 °C. The  
317 supernatant was carefully transferred into another ice-cooled falcon tube. Virions were  
318 concentrated by pelleting at 100,000 g through a 20% sucrose cushion for 2 h and resuspended in  
319 PBS -/- The concentrated viruses were used for further experiments.

#### 320 **Pre-acidification of virions and EVs**

321 EVs or viruses' samples post-isolation were acidified to pH 5.0 by adding 7% v/v of HCl 100 mM and  
322 incubated at 4°C for 45 min. Subsequently, 6.5% v/v of NaOH 100 mM was added to re-equilibrate  
323 the pH to 7.4 and samples were maintained at 4°C for at least 1 hour before being incubated with  
324 liposomes for membrane mixing assay (39, 52).

#### 325 **Membrane mixing assay**

326 All experiments were performed using a Cytation 5 Imaging Reader plate reader (BioTek) with a 96-  
327 well plate. Dil (Merck, CAT: 42364) and DiD (Thermo Fisher, D7757) labeled EVs and unlabeled LUVs  
328 were diluted in PBS -/- per well to reach a final ratio of 1:9 fluorescent particles to non-labeled  
329 vesicles, and fluorescence intensity of the donor (Dil) was recorded every 60 s for 30 min, with  
330 excitation wavelength of 530 nm and emission wavelengths of 570 nm. Subsequently, a volume  
331 fraction of HCl 100mM was added to reach the desired pH and Dil fluorescence intensity was  
332 recorded for 1 h every 60 s. Finally, Triton X-100 was added in each well to reach 0.1% final  
333 concentration and fluorescence intensity was recorded for 15 min every 60 s. The emission

334 fluorescence for each time point was measured as  $I_n$ . The emission fluorescence of the untreated  
335 liposomes was measured as  $I_0$ , and that of the liposomes solubilized with 0.1% TRITON X-100 was  
336 defined as  $I_{100}$ . The percentage of membrane mixing at each time point is defined as: donor relative  
337 intensity (% of TRITON X-100) =  $(I_n - I_0) \times 100 / (I_{100} - I_0)$ . All measurements were performed at 37 °C.  
338 The data was analyzed by using Gen5™ v. 3.04 software (BioTek).

### 339 **Size distribution NTA analysis for EV fusion events**

340 LUVs and EVs were mixed in a 1:1 ratio (particles:particles) to a final concentration of  $1-10 \times 10^8$   
341 particles/mL in 1mL of filtered PBS -/- and kept at 4°C for 1 hour. Prior to size NTA measurement, a  
342 7% v/v fraction of either PBS -/- or HCl 100 mM was added to maintain physiological pH or reach pH  
343 5.0, respectively. Samples were incubated at 37°C for 30 min and the size distribution was  
344 subsequently measured using a NanoSight NS300. Briefly, approximately 1ml solution was loaded  
345 into the sample chamber of an LM10 unit (NanoSight) and five videos of 60 s were recorded. Data  
346 analysis was performed with NTA 2.1 software (NanoSight). The resulting size distribution curves  
347 were then analyzed by considering the average diameter of each biological repeat, obtained from  
348 the instrumentation analysis software.

### 349 **EV protein digestion by Proteinase K**

350 Isolated EVs were incubated for 45 min at 37°C in the presence of 20 µg/ml Proteinase K (Invitrogen,  
351 AM2546). Following incubation, the sample was placed on ice and the proteinase activity was  
352 quenched with 2 mM phenylmethylsulfonyl fluoride (Merck, P7626) in DMSO.

### 353 **Preparation of Cryo-TEM samples**

354 Cryo-EM samples of both EVs and LUVs were prepared on either lacey carbon or C – flat EM grids  
355 (Electron Microscopy Sciences, USA), on which 10 nm Protein A colloidal gold particles (Au – NP)  
356 were pre-adsorbed (Aurion, Netherlands). Au – NP adsorbed grids were then glow-discharged (30 s,  
357 25 mA) in a Pelco EasiGlow system. An aliquot (3.5 µL) of the aqueous solution of the sample was



358 applied on to the carbon side of EM grids, which was then incubated in the humidity chamber of the  
359 instrument for 7 min at 100% humidity and room temperature, and subsequently blotted for 4.0 s  
360 at blot force -10 and plunge-frozen into the precooled liquid ethane with a Vitrobot Mark IV (FEI,  
361 USA).

### 362 **Cryo-TEM**

363 Cryo-electron micrographs of vitrified samples were collected using a transmission electron  
364 microscope Talos Arctica G3 TEM/STEM (Thermo Fisher Scientific, USA), equipped with a OneView  
365 camera (Gatan) at accelerating voltage of 200 kV. Grid mapping and image acquisition were  
366 performed using SerialEM software (53) at a nominal magnification of x180 and x13,500,  
367 respectively. High magnification images were recorded at x73,000 nominal magnification (0.411 nm  
368 pixel size) with a -3.5  $\mu\text{m}$  defocus value. To minimize radiation damage during image acquisition,  
369 low-dose mode in SerialEM software was used and electron dose was kept below  $100 \text{ e}^- \text{ \AA}^{-2}$ .

### 370 **Cryo-electron tomography (cryo-ET)**

371 Samples were prepared as for cryo -TEM (described above) with some modifications. Prior to  
372 plunging, samples were mixed 50:1 with a suspension of 10-nm Au – NP (Aurion, Netherlands) to  
373 serve as fiducial markers for reconstruction. Tilt series were collected using a transmission electron  
374 microscope Titan Krios 3Gi STEM/TEM microscope (Thermo Fisher Scientific, USA) at 300 kV  
375 equipped with a Gatan K3 direct detector mounted at the end of a Gatan BioQuantum energy filter  
376 set in zero-energy-loss mode (slit width, 20 eV). Tilt series were acquired in low dose mode using  
377 SerialEM (53) software at a nominal magnification of  $\times 42,000$  with an angular range from  $-60^\circ$  to  
378  $+60^\circ$ , an angular increment of  $4^\circ$  using a  $-3.5 \mu\text{m}$  defocus,  $70 \mu\text{m}$  objective aperture, 0.214 nm per  
379 pixel and a maximal total dose of  $150 \text{ e}^- \text{ \AA}^{-2}$ . Tomograms were reconstructed using the weighted  
380 back-projection technique in the IMOD software suite (54) with a SIRT-like filter equivalent to 5  
381 iterations, following nonlinear anisotropic diffusion (NAD) de-noising (55) if indicated.

## 382 **Cryo-EM image analysis of vesicles**

383 The spatial distribution of gray levels of vesicles' luminal content was analyzed from images  
384 collected both via Cryo-TEM or reconstructed Cryo-ET tilt series using the Radial Profile Angle plugin  
385 of Fiji (56). The obtained gray level intensity profiles, averaged over the radial angle of the lumen,  
386 were subsequently smoothed using a 25 points Savitzky-Golay filter on the OriginPro software to  
387 obtain the trend of the spatial distribution.

## 388 **Acknowledgments**

389 We thank Benjamin Podbilewicz for reagents and members of the Avinoam, Regev-Rudzki, and Gil  
390 labs for discussions. This research was supported by the ISRAEL SCIENCE FOUNDATION (grant No.  
391 1637/20), within the Israel Precision Medicine Partnership (IPMP) program to O.A., N.R.R and Z.G.  
392 This study was also supported by the European Research Council (ERC StG # 851080 to O.A.). O.A.  
393 also acknowledges funding from the David Barton Center for Research on the Chemistry of Life and  
394 the Ruth and Herman Albert Scholarship Program for New Scientists. O.A. is an incumbent of the  
395 Miriam Berman Presidential Development Chair. The research of N.R.R. is supported by the  
396 Benozio Endowment Fund for the Advancement of Science, the Jeanne and Joseph Nissim  
397 Foundation for Life Sciences Research and the Samuel M. Soref and Helene K. Soref Foundation.  
398 N.R.R is the incumbent of the Enid Barden and Aaron J. Jade President's Development Chair for New  
399 Scientists in Memory of Cantor John Y. Jade. N.R.R is grateful for the support from the European  
400 Research Council (ERC) (grant agreement No. 757743), the Weizmann - Sao Paulo Research  
401 Foundation (FAPESP) Brazil; supported by a research grant from the Instituto Serrapilheira and the  
402 Israel Science Foundation (ISF) (Grant Application no. 570/21). M.I.M was supported by the  
403 Lombroso Postdoctoral Fellowship for Cancer Research.

404 **Author Contributions**

405 M.I.M, N.R.R and O.A. conceived and designed the experiments. M.I.M and P.B performed most of  
406 the experiments. E.O.P, S.K, G.Z, P.A.B and Y.E.A produced viruses and assisted in cell maintenance  
407 and biochemistry. T.N, L. G, Z.G. assisted with EV assays. M.I.M, N.R.R and O.A. wrote the  
408 manuscript with inputs from all authors.

409 **Conflict of interest**

410 The authors declare no competing interests.

411 **References**

- 412 1. I. Wortzel, S. Dror, C. M. Kenific, D. Lyden, Exosome-Mediated Metastasis: Communication from a  
413 Distance. *Developmental Cell*. **49** (2019), pp. 347–360.
- 414 2. A. C. Boomgarden, J. W. Clancy, C. D’Souza-Schorey, Breaking Bad: Extracellular Vesicles Provoke  
415 Tumorigenic Responses Under Oxygen Deprivation. *Developmental Cell*. **55**, 111–113 (2020).
- 416 3. R. Kalluri, V. S. LeBleu, The biology, function, and biomedical applications of exosomes. *Science*. **367**  
417 (2020).
- 418 4. C. Yang, P. D. Robbins, The Roles of Tumor-Derived Exosomes in Cancer Pathogenesis. *Clinical and*  
419 *Developmental Immunology*. **2011**, 11 (2011).
- 420 5. S. García-Silva, A. Benito-Martín, L. Nogués, A. Hernández-Barranco, M. S. Mazariegos, V. Santos, M.  
421 Hergueta-Redondo, P. Ximénez-Embún, R. P. Kataru, A. A. Lopez, C. Merino, S. Sánchez-Redondo, O.  
422 Graña-Castro, I. Matei, J. Á. Nicolás-Avila, R. Torres-Ruiz, S. Rodríguez-Perales, L. Martínez, M. Pérez-  
423 Martínez, G. Mata, A. Szumera-Ciećkiewicz, I. Kalinowska, A. Saltari, J. M. Martínez-Gómez, S. A.  
424 Hogan, H. U. Saragovi, S. Ortega, C. Garcia-Martin, J. Boskovic, M. P. Levesque, P. Rutkowski, A.  
425 Hidalgo, J. Muñoz, D. Megías, B. J. Mehrara, D. Lyden, H. Peinado, Melanoma-derived small  
426 extracellular vesicles induce lymphangiogenesis and metastasis through an NGFR-dependent  
427 mechanism. *Nature Cancer* 2021 2:12. **2**, 1387–1405 (2021).
- 428 6. X. B. Li, Z. R. Zhang, H. J. Schluesener, S. Q. Xu, Role of exosomes in immune regulation. *Journal of*  
429 *Cellular and Molecular Medicine*. **10** (2006), pp. 364–375.
- 430 7. Y. Tian, S. Li, J. Song, T. Ji, M. Zhu, G. J. Anderson, J. Wei, G. Nie, A doxorubicin delivery platform  
431 using engineered natural membrane vesicle exosomes for targeted tumor therapy. *Biomaterials*. **35**,  
432 2383–2390 (2014).
- 433 8. V. S. LeBleu, R. Kalluri, Exosomes as a Multicomponent Biomarker Platform in Cancer. *Trends in*  
434 *Cancer*. **6** (2020), pp. 767–774.
- 435 9. H. Zhang, D. Freitas, H. S. Kim, K. Fabijanic, Z. Li, H. Chen, M. T. Mark, H. Molina, A. B. Martin, L.  
436 Bojmar, J. Fang, S. Rampersaud, A. Hoshino, I. Matei, C. M. Kenific, M. Nakajima, A. P. Mutvei, P.  
437 Sansone, W. Buehring, H. Wang, J. P. Jimenez, L. Cohen-Gould, N. Paknejad, M. Brendel, K. Manova-  
438 Todorova, A. Magalhães, J. A. Ferreira, H. Osório, A. M. Silva, A. Massey, J. R. Cubillos-Ruiz, G.  
439 Galletti, P. Giannakakou, A. M. Cuervo, J. Blenis, R. Schwartz, M. S. Brady, H. Peinado, J. Bromberg,  
440 H. Matsui, C. A. Reis, D. Lyden, Identification of distinct nanoparticles and subsets of extracellular  
441 vesicles by asymmetric flow field-flow fractionation. *Nature Cell Biology* 2018 20:3. **20**, 332–343  
442 (2018).
- 443 10. G. van Niel, G. D’Angelo, G. Raposo, Shedding light on the cell biology of extracellular vesicles.  
444 *Nature Reviews Molecular Cell Biology*. **19** (2018), pp. 213–228.
- 445 11. G. Valcz, E. I. Buzás, Á. Kittel, T. Krenács, T. Visnovitz, S. Spisák, G. Török, L. Homolya, S. Zsigrai, G.  
446 Kiszler, G. Antalffy, K. Pálóczi, Z. Szállási, V. Szabó, A. Sebestyén, N. Solymosi, A. Kalmár, K. Dede, P.  
447 Lőrincz, Z. Tulassay, P. Igaz, B. Molnár, En bloc release of MVB-like small extracellular vesicle clusters  
448 by colorectal carcinoma cells. *Journal of Extracellular Vesicles*. **8** (2019).
- 449 12. L. A. Mulcahy, R. C. Pink, D. R. F. Carter, Routes and mechanisms of extracellular vesicle uptake.  
450 *Journal of Extracellular Vesicles*. **3** (2014), , doi:10.3402/jev.v3.24641.
- 451 13. W. A. Wells, When is a virus an exosome? *Journal of Cell Biology*. **162**, 960 (2003).

- 452 14. E. N. Hoen, T. Cremer, R. C. Gallo, L. B. Margolis, Extracellular vesicles and viruses: Are they close  
453 relatives? *Proceedings of the National Academy of Sciences of the United States of America*. **113**,  
454 9155 (2016).
- 455 15. Y. Yamauchi, A. Helenius, Virus entry at a glance. *Journal of Cell Science*. **126**, 1289–1295 (2013).
- 456 16. T. Mebatsion, M. Konig, K. K. Conzelmann, Budding of Rabies Virus Particles in the Absence of the  
457 Spike Glycoprotein. *Cell*. **84**, 941–951 (1996).
- 458 17. B. S. Joshi, M. A. de Beer, B. N. G. Giepmans, I. S. Zuhorn, Endocytosis of Extracellular Vesicles and  
459 Release of Their Cargo from Endosomes. *ACS nano*. **14**, 4444–4455 (2020).
- 460 18. Z. Yao, Y. Qiao, X. Li, J. Chen, J. Ding, L. Bai, F. Shen, B. Shi, J. Liu, L. Peng, J. Li, Z. Yuan, Exosomes  
461 Exploit the Virus Entry Machinery and Pathway To Transmit Alpha Interferon-Induced Antiviral  
462 Activity. *Journal of Virology*. **92** (2018), doi:10.1128/jvi.01578-18.
- 463 19. E. Bonsergent, G. Lavieu, Content release of extracellular vesicles in a cell-free extract. *FEBS Letters*.  
464 **593**, 1983–1992 (2019).
- 465 20. E. Bonsergent, E. Grisard, J. Buchrieser, O. Schwartz, C. Théry, G. Lavieu, Quantitative  
466 characterization of extracellular vesicle uptake and content delivery within mammalian cells. *Nature*  
467 *Communications* 2021 12:1. **12**, 1–11 (2021).
- 468 21. K. Mitsui, Y. Koshimura, Y. Yoshikawa, M. Matsushita, Hiroshi Kanazawa, The endosomal Na<sup>+</sup>/H<sup>+</sup>  
469 exchanger contributes to multivesicular body formation by regulating the recruitment of ESCRT-0  
470 Vps27p to the endosomal membrane. *Journal of Biological Chemistry*. **286**, 37625–37638 (2011).
- 471 22. I. S. Kima, S. Jenni, M. L. Stanifer, E. Roth, S. P. J. Whelan, A. M. van Oijen, S. C. Harrison, Mechanism  
472 of membrane fusion induced by vesicular stomatitis virus G protein. *Proceedings of the National*  
473 *Academy of Sciences of the United States of America*. **114**, E28–E36 (2017).
- 474 23. Y. Yao, K. Ghosh, R. F. Eband, R. M. Eband, H. P. Ghosh, Membrane fusion activity of vesicular  
475 stomatitis virus glycoprotein G is induced by low pH but not by heat or denaturant. *Virology*. **310**,  
476 319–332 (2003).
- 477 24. N. Regev-Rudzki, D. W. Wilson, T. G. Carvalho, X. Sisquella, B. M. Coleman, M. Rug, D. Bursac, F.  
478 Angrisano, M. Gee, A. F. Hill, J. Baum, A. F. Cowman, Cell-cell communication between malaria-  
479 infected red blood cells via exosome-like vesicles. *Cell*. **153**, 1120–1133 (2013).
- 480 25. C. Théry, K. W. Witwer, E. Aikawa, M. J. Alcaraz, J. D. Anderson, R. Andriantsitohaina, A. Antoniou, T.  
481 Arab, F. Archer, G. K. Atkin-Smith, D. C. Ayre, J. M. Bach, D. Bachurski, H. Baharvand, L. Balaj, S.  
482 Baldacchino, N. N. Bauer, A. A. Baxter, M. Bebawy, C. Beckham, A. Bedina Zavec, A. Benmoussa, A. C.  
483 Berardi, P. Bergese, E. Bielska, C. Blenkinsop, S. Bobis-Wozowicz, E. Boilard, W. Boireau, A.  
484 Bongiovanni, F. E. Borràs, S. Bosch, C. M. Boulanger, X. Breakefield, A. M. Breglio, M. Brennan, D. R.  
485 Brigstock, A. Brisson, M. L. D. Broekman, J. F. Bromberg, P. Bryl-Górecka, S. Buch, A. H. Buck, D.  
486 Burger, S. Busatto, D. Buschmann, B. Bussolati, E. I. Buzás, J. B. Byrd, G. Camussi, D. R. F. Carter, S.  
487 Caruso, L. W. Chamley, Y. T. Chang, A. D. Chaudhuri, C. Chen, S. Chen, L. Cheng, A. R. Chin, A.  
488 Clayton, S. P. Clerici, A. Cocks, E. Cocucci, R. J. Coffey, A. Cordeiro-da-Silva, Y. Couch, F. A. W.  
489 Coumans, B. Coyle, R. Crescitelli, M. F. Criado, C. D'Souza-Schorey, S. Das, P. de Candia, E. F. de  
490 Santana, O. de Wever, H. A. del Portillo, T. Demaret, S. Deville, A. Devitt, B. Dhondt, D. di Vizio, L. C.  
491 Dieterich, V. Dolo, A. P. Dominguez Rubio, M. Dominici, M. R. Dourado, T. A. P. Driedonks, F. v.  
492 Duarte, H. M. Duncan, R. M. Eichenberger, K. Ekström, S. el Andaloussi, C. Elie-Caille, U. Erdbrügger,  
493 J. M. Falcón-Pérez, F. Fatima, J. E. Fish, M. Flores-Bellver, A. Förstner, A. Frelet-Barrand, F. Fricke, G.  
494 Fuhrmann, S. Gabrielsson, A. Gámez-Valero, C. Gardiner, K. Gärtner, R. Gaudin, Y. S. Gho, B. Giebel,

- 495 C. Gilbert, M. Gimona, I. Giusti, D. C. I. Goberdhan, A. Görgens, S. M. Gorski, D. W. Greening, J. C.  
496 Gross, A. Gualerzi, G. N. Gupta, D. Gustafson, A. Handberg, R. A. Haraszti, P. Harrison, H. Hegyesi, A.  
497 Hendrix, A. F. Hill, F. H. Hochberg, K. F. Hoffmann, B. Holder, H. Holthofer, B. Hosseinkhani, G. Hu, Y.  
498 Huang, V. Huber, S. Hunt, A. G. E. Ibrahim, T. Ikezu, J. M. Inal, M. Isin, A. Ivanova, H. K. Jackson, S.  
499 Jacobsen, S. M. Jay, M. Jayachandran, G. Jenster, L. Jiang, S. M. Johnson, J. C. Jones, A. Jong, T.  
500 Jovanovic-Talisman, S. Jung, R. Kalluri, S. ichi Kano, S. Kaur, Y. Kawamura, E. T. Keller, D. Khamari, E.  
501 Khomyakova, A. Khvorova, P. Kierulf, K. P. Kim, T. Kislinger, M. Klingeborn, D. J. Klinke, M. Kornek, M.  
502 M. Kosanović, Á. F. Kovács, E. M. Krämer-Albers, S. Krasemann, M. Krause, I. v. Kurochkin, G. D.  
503 Kusuma, S. Kuypers, S. Laitinen, S. M. Langevin, L. R. Languino, J. Lannigan, C. Lässer, L. C. Laurent, G.  
504 Lavieu, E. Lázaro-Ibáñez, S. le Lay, M. S. Lee, Y. X. F. Lee, D. S. Lemos, M. Lenassi, A. Leszczynska, I. T.  
505 S. Li, K. Liao, S. F. Libregts, E. Ligeti, R. Lim, S. K. Lim, A. Linē, K. Linnemannstöns, A. Llorente, C. A.  
506 Lombard, M. J. Lorenowicz, Á. M. Lörincz, J. Lötvall, J. Lovett, M. C. Lowry, X. Loyer, Q. Lu, B.  
507 Lukomska, T. R. Lunavat, S. L. N. Maas, H. Malhi, A. Marcilla, J. Mariani, J. Mariscal, E. S. Martens-  
508 Uzunova, L. Martin-Jaular, M. C. Martinez, V. R. Martins, M. Mathieu, S. Mathivanan, M. Maugeri, L.  
509 K. McGinnis, M. J. McVey, D. G. Meckes, K. L. Meehan, I. Mertens, V. R. Minciocchi, A. Möller, M.  
510 Møller Jørgensen, A. Morales-Kastresana, J. Morhayim, F. Mullier, M. Muraca, L. Musante, V.  
511 Mussack, D. C. Muth, K. H. Myburgh, T. Najrana, M. Nawaz, I. Nazarenko, P. Nejsun, C. Neri, T. Neri,  
512 R. Nieuwland, L. Nimrichter, J. P. Nolan, E. N. M. Nolte-'t Hoen, N. Noren Hooten, L. O'Driscoll, T.  
513 O'Grady, A. O'Loghlen, T. Ochiya, M. Olivier, A. Ortiz, L. A. Ortiz, X. Osteikoetxea, O. Ostegaard, M.  
514 Ostrowski, J. Park, D. M. Pegtel, H. Peinado, F. Perut, M. W. Pfaffl, D. G. Phinney, B. C. H. Pieters, R.  
515 C. Pink, D. S. Pisetsky, E. Pogge von Strandmann, I. Polakovicova, I. K. H. Poon, B. H. Powell, I. Prada,  
516 L. Pulliam, P. Quesenberry, A. Radeghieri, R. L. Raffai, S. Raimondo, J. Rak, M. I. Ramirez, G. Raposo,  
517 M. S. Rayyan, N. Regev-Rudzki, F. L. Ricklefs, P. D. Robbins, D. D. Roberts, S. C. Rodrigues, E. Rohde,  
518 S. Rome, K. M. A. Rouschop, A. Rughetti, A. E. Russell, P. Saá, S. Sahoo, E. Salas-Huenuleo, C.  
519 Sánchez, J. A. Saugstad, M. J. Saul, R. M. Schifflers, R. Schneider, T. H. Schøyen, A. Scott, E. Shahaj,  
520 S. Sharma, O. Shatnyeva, F. Shekari, G. V. Shelke, A. K. Shetty, K. Shiba, P. R. M. Siljander, A. M. Silva,  
521 A. Skowronek, O. L. Snyder, R. P. Soares, B. W. Sódar, C. Soekmadji, J. Sotillo, P. D. Stahl, W.  
522 Stoorvogel, S. L. Stott, E. F. Strasser, S. Swift, H. Tahara, M. Tewari, K. Timms, S. Tiwari, R. Tixeira, M.  
523 Tkach, W. S. Toh, R. Tomasini, A. C. Torrecilhas, J. P. Tosar, V. Toxavidis, L. Urbanelli, P. Vader, B. W.  
524 M. van Balkom, S. G. van der Grein, J. van Deun, M. J. C. van Herwijnen, K. van Keuren-Jensen, G. van  
525 Niel, M. E. van Royen, A. J. van Wijnen, M. H. Vasconcelos, I. J. Vechetti, T. D. Veit, L. J. Vella, É.  
526 Velot, F. J. Verweij, B. Vestad, J. L. Viñas, T. Visnovitz, K. v. Vukman, J. Wahlgren, D. C. Watson, M. H.  
527 M. Wauben, A. Weaver, J. P. Webber, V. Weber, A. M. Wehman, D. J. Weiss, J. A. Welsh, S. Wendt,  
528 A. M. Wheelock, Z. Wiener, L. Witte, J. Wolfram, A. Xagorari, P. Xander, J. Xu, X. Yan, M. Yáñez-Mó,  
529 H. Yin, Y. Yuana, V. Zappulli, J. Zarubova, V. Žekas, J. ye Zhang, Z. Zhao, L. Zheng, A. R. Zheutlin, A. M.  
530 Zickler, P. Zimmermann, A. M. Zivkovic, D. Zocco, E. K. Zuba-Surma, Minimal information for studies  
531 of extracellular vesicles 2018 (MISEV2018): a position statement of the International Society for  
532 Extracellular Vesicles and update of the MISEV2014 guidelines.  
533 <https://doi.org/10.1080/20013078.2018.1535750>. **7** (2018), doi:10.1080/20013078.2018.1535750.
- 534 26. S. Gupta, S. Rawat, V. Arora, S. K. Kottarath, A. K. Dinda, P. K. Vaishnav, B. Nayak, S. Mohanty, An  
535 improvised one-step sucrose cushion ultracentrifugation method for exosome isolation from culture  
536 supernatants of mesenchymal stem cells. *Stem Cell Research and Therapy*. **9**, 1–11 (2018).
- 537 27. I. Nunes-Correia, A. Eulálio, S. Nir, N. Düzgünes, J. Ramalho-Santos, M. C. Pedroso De Lima,  
538 Fluorescent probes for monitoring virus fusion kinetics: Comparative evaluation of reliability.  
539 *Biochimica et Biophysica Acta - Biomembranes*. **1561**, 65–75 (2002).
- 540 28. T. Stegmann, S. Nir, J. Wilschut, Membrane Fusion Activity of Influenza Virus. Effects of Gangliosides  
541 and Negatively Charged Phospholipids in Target Liposomes. *Biochemistry*. **28**, 1698–1704 (1989).

- 542 29. D. K. Struck, D. Hoekstra, R. E. Pagano, Use of Resonance Energy Transfer To Monitor Membrane  
543 Fusion. *Biochemistry*. **20**, 4093–4099 (1981).
- 544 30. E. Leikina, D. G. Gamage, V. Prasad, J. Goykhberg, M. Crowe, J. Diao, M. M. Kozlov, L. V.  
545 Chernomordik, D. P. Millay, Myomaker and Myomerger Work Independently to Control Distinct  
546 Steps of Membrane Remodeling during Myoblast Fusion. *Developmental Cell*. **46**, 767–780.e7 (2018).
- 547 31. G. Cardone, M. Brecher, J. Fontana, D. C. Winkler, C. Butan, J. M. White, A. C. Steven, Visualization of  
548 the Two-Step Fusion Process of the Retrovirus Avian Sarcoma/Leukosis Virus by Cryo-Electron  
549 Tomography. *Journal of Virology*. **86**, 12129–12137 (2012).
- 550 32. G. van den Bogaart, M. G. Holt, G. Bunt, D. Riedel, F. S. Wouters, R. Jahn, One SNARE complex is  
551 sufficient for membrane fusion. *Nature Structural & Molecular Biology* 2010 17:3. **17**, 358–364  
552 (2010).
- 553 33. A. Erazo-Oliveras, K. Najjar, D. Truong, T. Y. Wang, D. J. Brock, A. R. Prater, J. P. Pellois, The Late  
554 Endosome and Its Lipid BMP Act as Gateways for Efficient Cytosolic Access of the Delivery Agent  
555 dfTAT and Its Macromolecular Cargos. *Cell chemical biology*. **23**, 598–607 (2016).
- 556 34. T. Stegmann, D. Hoekstra, G. Scherphof, J. Wilschut, Kinetics of pH-Dependent Fusion between  
557 Influenza Virus and Liposomes. *Biochemistry*. **24**, 3107–3113 (1985).
- 558 35. A. Cvjetkovic, S. C. Jang, B. Konečná, J. L. Höög, C. Sihlbom, C. Lässer, J. Lötvall, Detailed Analysis of  
559 Protein Topology of Extracellular Vesicles—Evidence of Unconventional Membrane Protein  
560 Orientation. *Scientific Reports* 2016 6:1. **6**, 1–12 (2016).
- 561 36. B. M. Coleman, E. Hanssen, V. A. Lawson, A. F. Hill, Prion-infected cells regulate the release of  
562 exosomes with distinct ultrastructural features. *FASEB journal : official publication of the Federation  
563 of American Societies for Experimental Biology*. **26**, 4160–4173 (2012).
- 564 37. K. Dooley, R. E. Mcconnell, K. Xu, N. D. Lewis, S. Haupt, M. R. Youniss, S. Martin, C. L. Sia, C. Mccoy,  
565 R. J. Moniz, O. Burenkova, J. Sanchez-Salazar, S. C. Jang, B. Choi, R. A. Harrison, D. Houde, D. Burzyn,  
566 C. Leng, K. Kirwin, N. L. Ross, J. D. Finn, L. Gaidukov, K. D. Economides, S. Estes, J. E. Thornton, J. D.  
567 Kulman, S. Sathyanarayanan, D. E. Williams, A versatile platform for generating engineered  
568 extracellular vesicles with defined therapeutic properties. *Molecular Therapy* (2021),  
569 doi:10.1016/j.ymthe.2021.01.020.
- 570 38. S. T. Yang, V. Kiessling, J. A. Simmons, J. M. White, L. K. Tamm, HIV gp41-mediated membrane fusion  
571 occurs at edges of cholesterol-rich lipid domains. *Nature Chemical Biology* (2015),  
572 doi:10.1038/nchembio.1800.
- 573 39. T. Stegmann, F. P. Booy, J. Wilschut, Effects of low pH on influenza virus. Activation and inactivation  
574 of the membrane fusion capacity of the hemagglutinin. *Journal of Biological Chemistry*. **262**, 17744–  
575 17749 (1987).
- 576 40. F. J. Verweij, M. P. Bebelman, C. R. Jimenez, J. J. Garcia-Vallejo, H. Janssen, J. Neefjes, J. C. Knol, R. de  
577 Goeij-de Haas, S. R. Piersma, S. R. Baglio, M. Verhage, J. M. Middeldorp, A. Zomer, J. van Rheenen,  
578 M. G. Coppelino, I. Hurbain, G. Raposo, M. J. Smit, R. F. G. Toonen, G. van Niel, D. M. Pegtel,  
579 Quantifying exosome secretion from single cells reveals a modulatory role for GPCR signaling.  
580 *Journal of Cell Biology*. **217**, 1129–1142 (2018).
- 581 41. A. Puri, J. Winick, R. J. Lowys, D. Covell, O. Eidelman, A. Walter, R. Blumenthals, Activation of  
582 Vesicular Stomatitis Virus Fusion with Cells by Pretreatment at Low pH\*. *Journal of Biological  
583 Chemistry*. **263**, 4749–4753 (1988).

- 584 42. A. Frauke Beilstein, A. Abou Hamdan, H. lè ne Raux, L. Belot, M. Ouldali, A. A. lie Albertini, Y. Gaudin  
585 Correspondence, Identification of a pH-Sensitive Switch in VSV-G and a Crystal Structure of the G  
586 Pre-fusion State Highlight the VSV-G Structural Transition Pathway. *CellReports*. **32**, 108042 (2020).
- 587 43. Y. Gaudin, Reversibility in fusion protein conformational changes. The intriguing case of rhabdovirus-  
588 induced membrane fusion. *Sub-cellular biochemistry*. **34** (2000), pp. 379–408.
- 589 44. L. v. Chernomordik, M. M. Kozlov, Mechanics of membrane fusion. *Nature structural & molecular*  
590 *biology*. **15**, 675–683 (2008).
- 591 45. J. Fontana, A. C. Steven, Influenza virus-mediated membrane fusion: Structural insights from  
592 electron microscopy. *Archives of Biochemistry and Biophysics*. **581** (2015), pp. 86–97.
- 593 46. P. Chlanda, E. Mekhedov, H. Waters, C. L. Schwartz, E. R. Fischer, R. J. Ryham, F. S. Cohen, P. S.  
594 Blank, J. Zimmerberg, The hemifusion structure induced by influenza virus haemagglutinin is  
595 determined by physical properties of the target membranes. *Nature Microbiology*. **1**, 1–8 (2016).
- 596 47. E. Dekel, D. Yaffe, I. Rosenhek-Goldian, G. Ben-Nissan, Y. Ofir-Birin, M. I. Morandi, T. Ziv, X. Sisquella,  
597 M. A. Pimentel, T. Nebl, E. Kapp, Y. Ohana Daniel, P. A. Karam, D. Alfandari, R. Rotkopf, S. Malihi, T.  
598 B. Temin, D. Mullick, O. Y. Revach, A. Rudik, N. S. Gov, I. Azuri, Z. Porat, G. Bergamaschi, R. Sorkin, G.  
599 J. L. Wuite, O. Avinoam, T. G. Carvalho, S. R. Cohen, M. Sharon, N. Regev-Rudzki, 20S proteasomes  
600 secreted by the malaria parasite promote its growth. *Nature Communications 2021 12:1*. **12**, 1–19  
601 (2021).
- 602 48. C. Théry, S. Amigorena, G. Raposo, A. Clayton, Isolation and Characterization of Exosomes from Cell  
603 Culture Supernatants and Biological Fluids. *Current Protocols in Cell Biology*. **30** (2006),  
604 doi:10.1002/0471143030.cb0322s30.
- 605 49. A. Erazo-Oliveras, K. Najjar, D. Truong, T. Y. Wang, D. J. Brock, A. R. Prater, J. P. Pellois, The Late  
606 Endosome and Its Lipid BMP Act as Gateways for Efficient Cytosolic Access of the Delivery Agent  
607 dftAT and Its Macromolecular Cargos. *Cell Chemical Biology*. **23**, 598–607 (2016).
- 608 50. J. P. Morgenstern, H. Land, Advanced mammalian gene transfer: high titre retroviral vectors with  
609 multiple drug selection markers and a complementary helper-free packaging cell line. *Nucleic acids*  
610 *research*. **18**, 3587–3596 (1990).
- 611 51. A. Takada, C. Robison, H. Goto, A. Sanchez, K. G. Murti, M. A. Whitt, Y. Kawaoka, A system for  
612 functional analysis of Ebola virus glycoprotein. *Proceedings of the National Academy of Sciences*. **94**,  
613 14764–14769 (1997).
- 614 52. C. Weiss, H. F. Clark, Rapid inactivation of rotaviruses by exposure to acid buffer or acidic gastric  
615 juice. *Journal of General Virology*. **66**, 2725–2730 (1985).
- 616 53. D. N. Mastronarde, Automated electron microscope tomography using robust prediction of  
617 specimen movements. *Journal of Structural Biology*. **152**, 36–51 (2005).
- 618 54. J. R. Kremer, D. N. Mastronarde, J. R. McIntosh, Computer Visualization of Three-Dimensional Image  
619 Data Using IMOD. *Journal of Structural Biology*. **116**, 71–76 (1996).
- 620 55. A. S. Frangakis, R. Hegerl, Noise reduction in electron tomographic reconstructions using nonlinear  
621 anisotropic diffusion. *Journal of structural biology*. **135**, 239–250 (2001).
- 622 56. J. Schindelin, I. Arganda-Carreras, E. Frise, V. Kaynig, M. Longair, T. Pietzsch, S. Preibisch, C. Rueden,  
623 S. Saalfeld, B. Schmid, J. Y. Tinevez, D. J. White, V. Hartenstein, K. Eliceiri, P. Tomancak, A. Cardona,



624 Fiji: an open-source platform for biological-image analysis. *Nature Methods* 2012 9:7. **9**, 676–682  
625 (2012).  
626  
627

628 **FIGURE LEGEND**

629 **Figure1. EV-LUV *in vitro* system to investigate membrane fusion. (A)** Graphical illustration of the  
630 EV uptake/cargo delivery pathway. **(B)** Comparison of the size distribution of EVs (red) and LUVs  
631 (black) measured via NTA. **(C)** Representative Cryo-TEM image of EVs isolated from OVCAR-3 cell  
632 supernatants and LUVs. Scale bar 100nm. **(D)** Radial intensity profile of gray levels in the lumens of  
633 EVs (red) and LUVs (black). Dots represent data points obtained from radially averaged line profiles  
634 of gray level intensity. Lines represent data smoothed using a 25 points Savitzky-Golay filter. **(E)**  
635 Western blot analysis of density gradient fractions (pooled by density) and OVCAR-3 cell lysate (as  
636 a control) using antibodies against EV (Alix, CD9 and CD63) and control protein determinants  
637 (TOM20). Illustration created with BioRender.com.

638 **Figure 2. EV fuse in a protein and pH-dependent manner reminiscent of viruses. (A)** Illustration of  
639 the FRET-based membrane mixing assay employed to quantify fusion between EVs and liposomes.  
640 Highly FRET-efficiency labeled EVs are incubated with non-labeled liposomes and their ability to fuse  
641 is probed by monitoring the donor fluorescent intensity after triggering. **(B)** Representative curves  
642 of membrane mixing assay for either retrovirus (green) or EV (orange) incubated with unlabeled  
643 LUVs at pH 7.4 (dotted line) or pH 5.0 (solid line). **(C)** FRET fusion assay for labeled retroviruses, EVs  
644 and LUVs, incubated with LUVs at either pH 7.4 (green) or pH 5.0 (orange), showing that retroviruses  
645 and EVs fuse with similar efficiencies. LUVs mimicked the late endosome lipid composition. **(D)**  
646 Representative NTA size distribution curves of EVs-LUVs mixtures upon incubation at pH 7.4 (green)  
647 or pH 5.0 (orange) showing increase in vesicle size after mixing and triggering with pH 5.0. **(E)** FRET  
648 membrane mixing assay comparing EVs treated with Proteinase K (PK, orange) or non-treated  
649 (green), incubated with late endosomal-mimicking LUVs at pH 5.0. **(F)** Western blot for membrane  
650 protein EV marker, PTGFRN, and intraluminal protein Alix for non-treated and PK – treated EVs,  
651 showing that proteinase only digests proteins on the surface of the EVs.

652

653 **Figure 3. EV fuse using a lipid-composition dependent but reversible mechanism**

654 **(A)** FRET fusion assay for EVs incubated with LUVs composed of DOPC (DOPC), early endosome-  
655 mimicking LUVs, or late endosome-mimicking LUVs at pH 5.0. **(B)** Membrane mixing assay to probe  
656 reversibility of the putative EV fusogen. EVs, Retroviruses, and VSV viruses were incubated at pH 5.0  
657 and subsequently brought back to pH 7.4 and mixed with LUVs at pH 5.0.

658 **Figure 4. Cryo-EM imaging reveals EV hemifusion intermediates**

659 **(A)** Illustration showing canonical membrane fusion intermediates. Contact: the viral membrane is  
660 tightly in contact (< 2 nm) with the apposing membrane and the two bilayers run parallel to each  
661 other. Hemifusion: the two proximal leaflets of lipid bilayers have joined and the hemifusion  
662 diaphragm is composed of only the two remaining leaflets. Content mixing: the two membranes  
663 merge at the contact point with the two bilayers transitioning continuously from one onto the  
664 other. At this stage, the content can mix, but the pores can still collapse and reseal. Expanded  
665 pore: the fusion pore increases in diameter and complete content mixing can occur. **(B – E)**  
666 Representative Cryo – TEM images of EV-LUV fusion intermediates. Insets show the interaction  
667 spot at higher magnification (Top panel). Middle panel: Outlines showing EV (magenta) and LUV  
668 (green) membranes as defined by luminal gray level distribution. Bottom panel: Line profile to  
669 evaluate the presence of bilayer-leaflets. Yellow and white lines indicate membrane leaflets in  
670 inset and region where line profile was acquired, respectively. **(B)** Contact between EV and LUV **(C)**  
671 Hemifusion. Arrow indicates the location where the two bilayers merged into one. **(D)** Content  
672 mixing. White arrow indicates the fusion pore. **(E)** Expanded pore: dumbbell-shaped pore with an  
673 enlarged neck and apparent flow of the EV cargo into the LUV lumen. White arrow indicates the  
674 putative extended neck where the vesicles fused. **(F)** Quantification of interaction intermediates

675 for LUVs – LUVs and EVs – LUVs systems at pH 7.4 and 5.0. **(G)** Tomographic reconstruction of EVs  
676 (magenta) – LUV (green) interaction at pH 5.0 revealing content mixing between the vesicles.  
677 White arrowhead indicates the fusion pore.

678

679 **FIGURES**

680 **Figure 1**

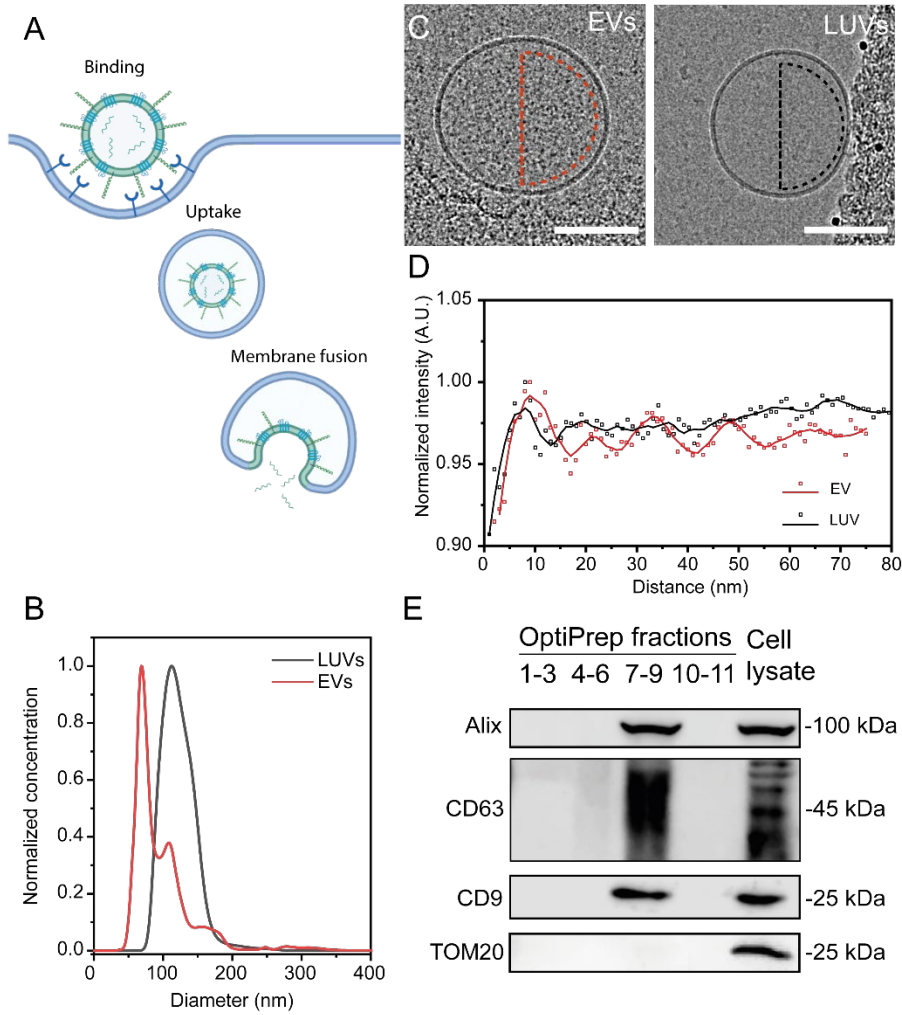

681

682

683 **Figure 2**

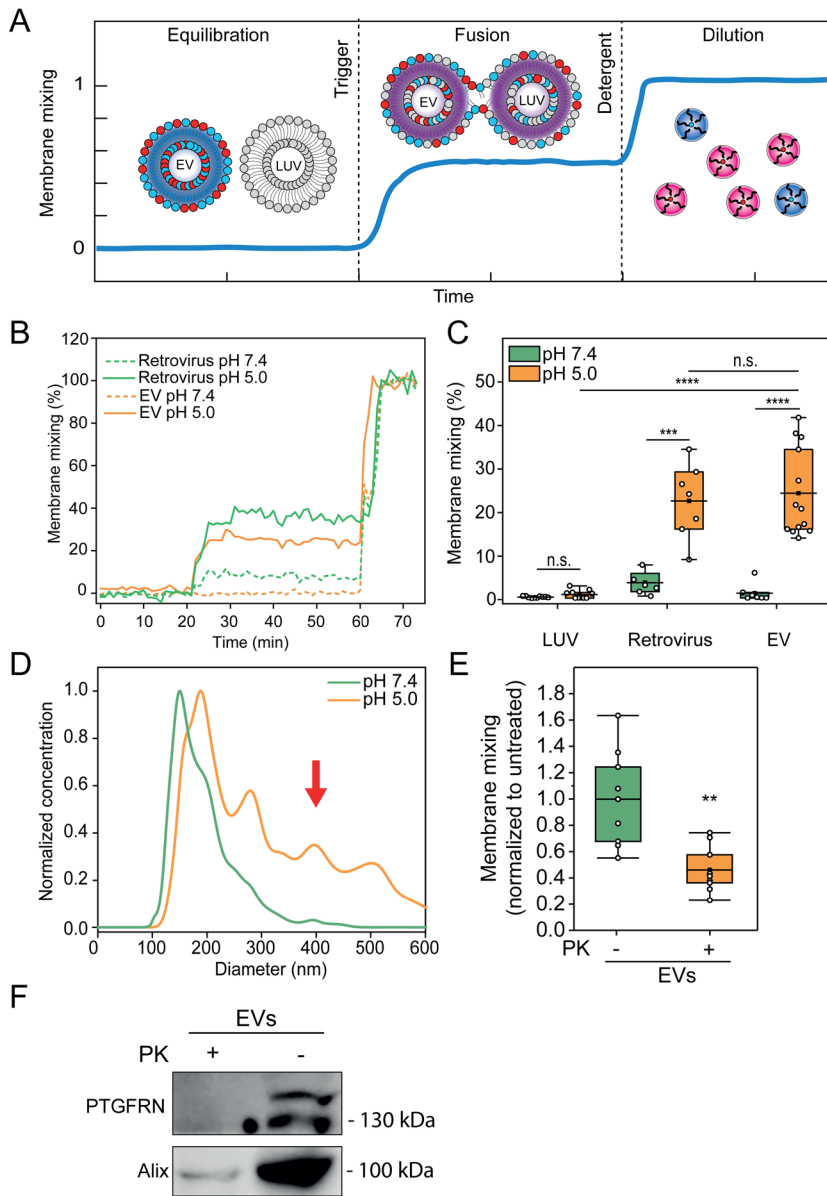

684

685

686 **Figure 3**

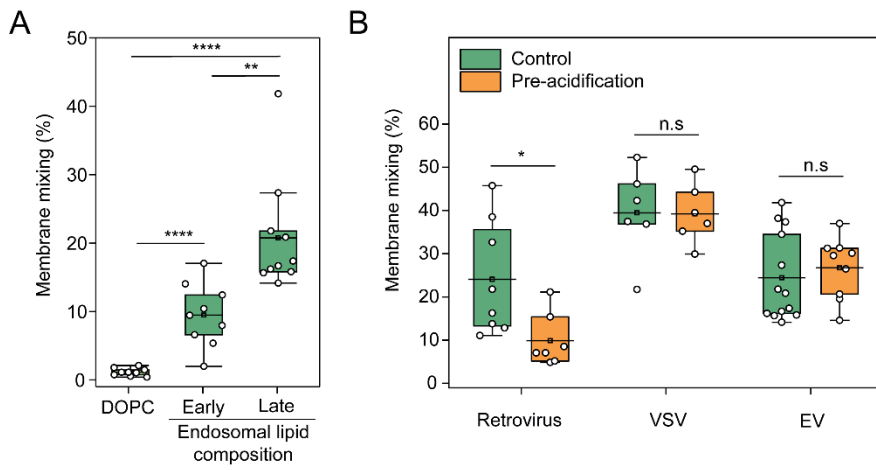

687

688

689 **Figure 4**

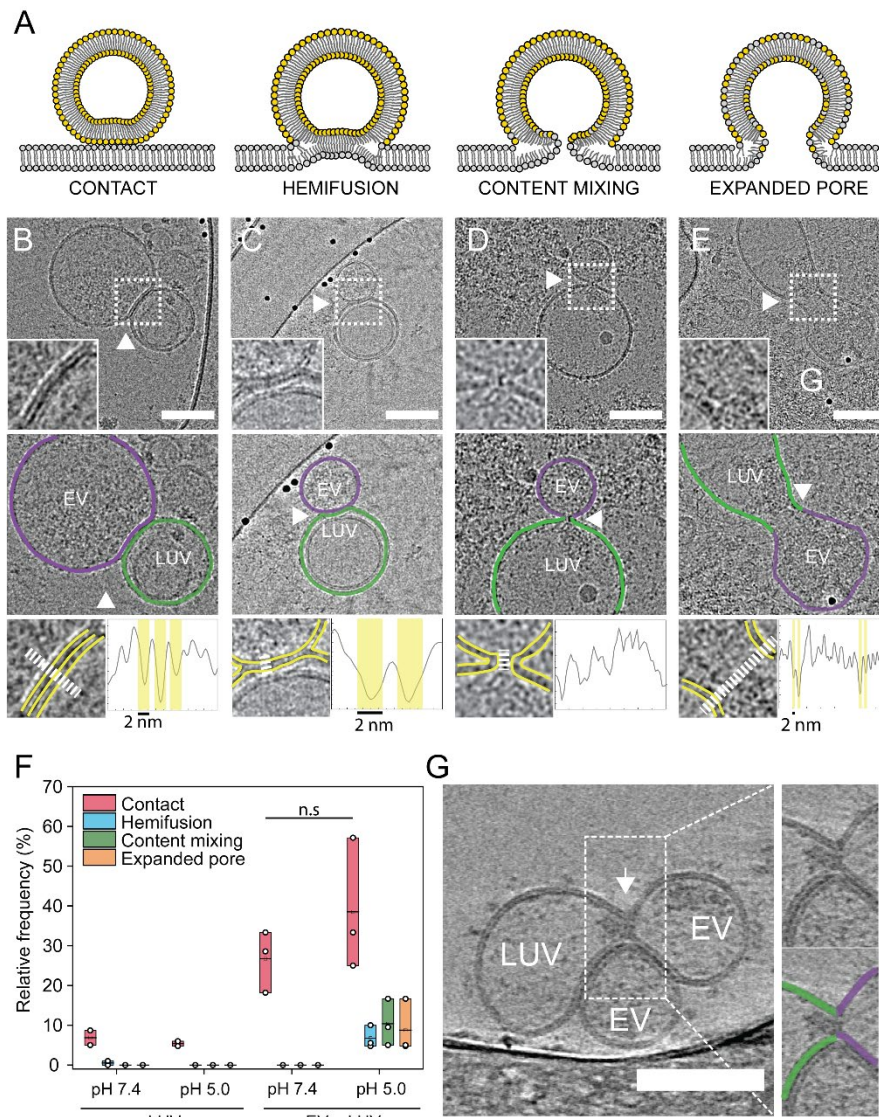

690

691

692

693
